# Supplementary material
Source: ML conference proceedings conference paper supplement (https://proceedings.mlr.press/v84/ye18a.html)
Supplement: Supplementary file 1 [file ye18a-supp.pdf]

---

# Supplementary Material of “HONES: A Fast and Error-free Homotopy Method For Online Newton Step”

---

## A Roadmap of Appendices

The general idea of HONES algorithm has been presented in section 2. However, to implement it efficiently, we need much more effort to explore the structure of the solution path and find common quantities which are used by multiple sub-routines. To make the derivation well-organized, we start from considering the case where only one of  $A$  and  $r$  is time-varying while the other parameter is fixed. The case where  $A$  is time-varying and the case where  $r$  is time-varying are considered separately in Appendix B and C. Then in Appendix D, we combine two components and state the implementation for the general case.

In each following appendix, we will first define a list of case-specific intermediate variables, which are the key ingredients to improve efficiency. Then we describe the whole procedure followed by details of each sub-routine. Finally, we give a detailed complexity analysis at the end of each appendix.

## B Implementation of HONES Algorithm With Time-Varying $A$ and Fixed $r$

### B-1 Intermediate Variables

Although (8)-(10) completely define the solution, they involves messy terms. To simplify the notations, we define three lists of intermediate variables. We should emphasize that these variables also play important roles in the algorithm design since they capture the quantities repeatedly appeared and unnecessary computation can be avoided by storing their values in memory.

The intermediate variables are defined as follows. First, let  $M$  be a  $n \times n$  matrix such that

$$M_{SS} = A_{SS}^{-1}, \quad M_{S^cS} = -A_{S^cS}A_{SS}^{-1}, \quad M_{\cdot, S^c} = 0. \quad (\text{B-1})$$

For large-scale problem where  $n$  is prohibitively large, we can only store a  $n \times |S|$  matrix by removing the zero entries of  $M$ . This saves storage cost significantly. Then we define two vectors  $\eta, \tilde{\eta} \in \mathbb{R}^n$  such that

$$\eta_S = M_{SS}g_S, \quad \eta_{S^c} = g_{S^c} + M_{S^cS}g_S, \quad \tilde{\eta}_S = M_{SS}\mathbf{1}_S, \quad \tilde{\eta}_{S^c} = \mathbf{1}_{S^c} + M_{S^cS}\mathbf{1}_S \in \mathbb{R}^n. \quad (\text{B-2})$$

Last we define four scalars.

$$D = \mathbf{1}_S^T A_{SS}^{-1} \mathbf{1}_S, \quad D_g = \mathbf{1}_S^T A_{SS}^{-1} g_S, \quad D_{gg} = g_S^T A_{SS}^{-1} g_S, \quad D_{gr} = -\eta_S^T r_S. \quad (\text{B-3})$$

Note that all variables are functions of  $\lambda$  if  $A$  is replaced by  $A + \lambda g g^T$  and we denote them by  $\cdot(\lambda)$ . For example,

$$D(\lambda) = \mathbf{1}_S^T (A_{SS} + \lambda g_S g_S^T)^{-1} \mathbf{1}_S,$$

and others can be defined in a similar fashion. The following lemma formulates these functions.

**Lemma B-1** Let  $\alpha(\lambda) = \frac{\lambda}{1 + \lambda D_{gg}}$ . Before any entry of  $(x_S, \mu_{S^c})$  hitting 0, it holds that

- $M_{\cdot, S}(\lambda) = M_{\cdot, S} - \alpha(\lambda) \eta \eta_S^T$ ;

- $\eta(\lambda) = \frac{\eta}{1+\lambda D_{gg}}$ ;
- $\tilde{\eta}(\lambda) = \tilde{\eta} - \alpha(\lambda)D_g\eta$ ;
- $D(\lambda) = D - \alpha(\lambda)D_g^2$ ;
- $(D_g(\lambda), D_{gg}(\lambda), D_{gr}(\lambda)) = \frac{1}{1+\lambda D_{gg}}(D_g, D_{gg}, D_{gr})$ .

**Proof** By Sherman-Morrison-Woodbury formula,

$$M_{SS}(\lambda) = (A_{SS} + \lambda g_S g_S^T)^{-1} = A_{SS}^{-1} - \lambda \frac{A_{SS}^{-1} g_S g_S^T A_{SS}^{-1}}{1 + \lambda g_S^T A_{SS}^{-1} g_S} = M_{SS} - \alpha(\lambda) \eta_S \eta_S^T.$$

This implies that

$$\begin{aligned} M_{S^c S}(\lambda) &= -(A_{S^c S} + \lambda g_{S^c} g_S^T)(A_{SS}^{-1} - \alpha(\lambda) \eta_S \eta_S^T) \\ &= M_{S^c S} - \lambda g_{S^c} g_S^T A_{SS}^{-1} + \lambda \alpha(\lambda) g_{S^c} g_S^T \eta_S \eta_S^T + \alpha(\lambda) A_{S^c S} \eta_S \eta_S^T \\ &= M_{S^c S} - \lambda g_{S^c} \eta_S^T + \lambda \alpha(\lambda) D_{gg} g_{S^c} \eta_S^T + \alpha(\lambda) A_{S^c S} \eta_S \eta_S^T && \text{[Use } D_{gg} = g_S^T \eta_S \text{]} \\ &= M_{S^c S} - (\lambda - \lambda \alpha(\lambda) D_{gg}) g_{S^c} \eta_S^T + \alpha(\lambda) A_{S^c S} \eta_S \eta_S^T \\ &= M_{S^c S} - \alpha(\lambda) g_{S^c} \eta_S^T + \alpha(\lambda) A_{S^c S} \eta_S \eta_S^T && \text{[Use } \lambda - \lambda \alpha(\lambda) D_{gg} = \alpha(\lambda) \text{]} \\ &= M_{S^c S} - \alpha(\lambda) (g_{S^c} - A_{S^c S} A_{SS}^{-1} g_S) \eta_S^T \\ &= M_{S^c S} - \alpha(\lambda) \eta_{S^c} \eta_S^T. \end{aligned}$$

Putting pieces together, we obtain that

$$M_{\cdot, S}(\lambda) = M_{\cdot, S} - \alpha(\lambda) \eta \eta_S^T.$$

Based on  $M_{\cdot, S}(\lambda)$ , it is straightforward to derive other variables. For  $\eta(\lambda)$ ,

$$\begin{aligned} \eta_S(\lambda) &= M_{SS}(\lambda) g_S = \eta_S - \alpha(\lambda) \eta_S \eta_S^T g_S \\ &= (1 - \alpha(\lambda) D_{gg}) \eta_S = \frac{\eta_S}{1 + \lambda D_{gg}}; \\ \eta_{S^c}(\lambda) &= g_{S^c} + M_{S^c S}(\lambda) g_S = \eta_{S^c} - \alpha(\lambda) \eta_{S^c} \eta_S^T g_S \\ &= (1 - \alpha(\lambda) D_{gg}) \eta_{S^c} = \frac{\eta_{S^c}}{1 + \lambda D_{gg}}. \end{aligned}$$

Thus,

$$\eta(\lambda) = \frac{\eta}{1 + \lambda D_{gg}}.$$

Similarly,,

$$\begin{aligned} \tilde{\eta}_S(\lambda) &= M_{SS}(\lambda) \mathbf{1}_S = \tilde{\eta}_S - \alpha(\lambda) \eta_S \eta_S^T \mathbf{1}_S \\ &= \tilde{\eta}_S - \alpha(\lambda) D_g \eta_S; \\ \tilde{\eta}_{S^c}(\lambda) &= \mathbf{1}_{S^c} + M_{S^c S}(\lambda) \mathbf{1}_S = \mathbf{1}_{S^c} - \alpha(\lambda) \eta_{S^c} \eta_S^T \mathbf{1}_S \\ &= \tilde{\eta}_{S^c} - \alpha(\lambda) D_g \eta_{S^c}, \end{aligned}$$

and hence

$$\tilde{\eta}(\lambda) = \tilde{\eta} - \alpha(\lambda) D_g \eta.$$

The last four scalars are even easier to handle. In fact,  $D(\lambda)$  can be derived directly by

$$D(\lambda) = \mathbf{1}_S^T (M_{SS} - \alpha(\lambda) \eta_S \eta_S^T) \mathbf{1}_S = D - \alpha(\lambda) D_g^2$$

By reformulating the other three variables, the last statement can be proved,

$$\begin{aligned} (D_g(\lambda), D_{gg}(\lambda), D_{gr}(\lambda)) &= (\mathbf{1}_S^T \eta_S(\lambda), g_S^T \eta_S(\lambda), -r_S^T \eta_S(\lambda)) \\ &= \frac{1}{1 + \lambda D_{gg}} (\mathbf{1}_S^T \eta_S, g_S^T \eta_S, -r_S^T \eta_S) \\ &= \frac{1}{1 + \lambda D_{gg}} (D_g, D_{gg}, D_{gr}). \end{aligned}$$

■

## B-2 Implementation

Lemma B-1 implies that given the function values of the intermediate variables at  $\lambda = 0$ , the function values at a neighborhood of 0 can be calculated directly. Within time  $t$ , all intermediate variables will be update correspondingly when the support changes. It has been shown in Theorem B-4 that updating  $M$  requires  $n|S|$  operations while updating other variables only requires  $n$  operations. When the problem transfer from time  $t$  to time  $t + 1$ , the variables  $(\eta, D_g, D_{gg}, D_{gr})$  needs to be recalculated since it depends on a new  $g^{(t+1)}$ . In contrast,  $(M, \tilde{\eta}, D)$  can be updated in the same way as in time  $t$ . In summary,  $(M, \tilde{\eta}, D)$  is shared by for all times while  $(\eta, D_g, D_{gg}, D_{gr})$  is only used in a single time. For compact notations, we define  $\text{Par}_1$  and  $\text{Par}_2$  as

$$\text{Par}_1 = \{M, \tilde{\eta}, D\}, \quad \text{Par}_2 = \{\eta, D_g, D_{gg}, D_{gr}\}. \quad (\text{B-4})$$

In addition, we denote  $v$  by the concatenation of  $x_S$  and  $-\mu_{S^c}$ , i.e.

$$v_S = x_S, \quad v_{S^c} = -\mu_{S^c}, \quad (\text{B-5})$$

as a  $n \times 1$  vector. It will be shown in the next subsection that  $v(\lambda)$  can be expressed in a concise way.

Algorithm 1 describes the full implementation of HONES algorithm, which solves the online problem (2) with  $r$  fixed. The sub-routines involved will be discussed separately in following subsections. Roughly speaking, after initialization, we enter into the outer-loop and try to solve (1) at time  $t$  using the information from time  $t - 1$ . Starting from  $\lambda = 0$ , we search for the next  $\lambda$  that pushes one entry of  $v$  to zero. `FIND_LAMBDA` fulfills this goal and also reports the corresponding entry  $j$ . If  $j \in S$  then  $j$  is removed from  $S$  and otherwise  $j$  is added into  $S$ . Since  $(v, \mu_0, \text{Par}_1, \text{Par}_2)$  are all functions of  $\lambda$ , we update them by `UPDATE_BY_LAMBDA`, in which  $\lambda^{\text{inc}}$  denotes the increment to reach the next turning point from the current one. Unlike  $(v, \mu_0)$ ,  $(\text{Par}_1, \text{Par}_2)$  has discontinuity at each turning point  $\lambda$  due to the change of support  $S$ . They are updated by `UPDATE_SHRINK_SUPPORT` and `UPDATE_EXPAND_SUPPORT` depending on whether  $S$  is shrunk or expanded. The procedure is repeated until  $\lambda$  cross over 1 and an inner-loop finishes. At the end,  $\text{Par}_2$  is recomputed for new  $g^{(t+1)}$ , which is achieved by `DIRECT_UPDATE`.

## B-3 FIND\_LAMBDA

With the help of intermediate variables, we can express  $(x_S, \mu_{S^c}, \mu_0)$  in a compact way.

**Theorem B-4** *Before any entry of  $(x_S, \mu_{S^c})$  hitting 0, it holds that*

$$\mu_0(\lambda) = \mu_0 + \frac{\alpha(\lambda)}{D - \alpha(\lambda)D_g^2} \cdot D_g(D_g\mu_0 - D_{gr}). \quad (\text{B-6})$$

and

$$v(\lambda) \triangleq \begin{pmatrix} x_S(\lambda) \\ -\mu_{S^c}(\lambda) \end{pmatrix} = v + \frac{\alpha(\lambda)}{D - \alpha(\lambda)D_g^2} \cdot (D_g\mu_0 - D_{gr}) \cdot (D_g\tilde{\eta} - D\eta), \quad (\text{B-7})$$

**Proof** First we prove (B-6). By definition,

$$\mu_0(\lambda) = \frac{1 - \mathbf{1}_S^T A_{SS}(\lambda)^{-1} r_S}{\mathbf{1}_S^T A_{SS}(\lambda)^{-1} \mathbf{1}_S} = \frac{1 - \mathbf{1}_S^T M_{SS}(\lambda) r_S}{D(\lambda)}.$$

By Lemma B-1,

$$\begin{aligned} -M_{SS}(\lambda) r_S &= -(M_{SS} - \alpha(\lambda)\eta_S \eta_S^T) r_S \\ &= -M_{SS} r_S - \alpha(\lambda)\eta_S \eta_S^T r_S = -M_{SS} r_S + \alpha(\lambda) D_{gr} \eta_S. \end{aligned}$$

Thus the numerator of  $\mu_0(\lambda)$  can be written as

$$1 - \mathbf{1}_S^T y_S + \mathbf{1}_S^T (M_{S^c S}^T y_{S^c} - M_{SS} r_S) - \alpha(\lambda) D_{gr} \mathbf{1}_S^T \eta_S = D\mu_0 - \alpha(\lambda) D_{gr} D_g.$$

The denominator of  $\mu_0(\lambda)$ , by Lemma B-1, is formulated as

$$D(\lambda) = D - \alpha(\lambda) D_g^2.$$

---

**Algorithm 1** HONES Algorithm for time-varying  $A$  and fixed  $r$ 


---

**Inputs:** Initial matrix  $A^{(0)}$ , vectors  $r$ , matrix-update-vectors  $\{g^{(t)}, t = 1, 2, \dots\}$ .

**Initialization:**

$x \leftarrow$  as the optimum corresponding to  $A^{(0)}$ ;  
 $S \leftarrow \text{supp}(x)$ ;  
Calculate  $(x, \mu, \mu_0)$  via (8)-(10)  
 $v_S \leftarrow x_S, v_{S^c} \leftarrow -\mu_{S^c}$ ;  
Calculate intermediate variables  $(\text{Par}_1, \text{Par}_2)$  via (B-1)-(B-3) with  $g = g^{(1)}$ .

**Procedure:**

```

1: for  $t = 1, 2, \dots$  do
2:    $\lambda \leftarrow 0$ ;
3:   while  $\lambda < 1$  do
4:      $(\lambda^{\text{inc}}, j, S^{\text{new}}) \leftarrow \text{FIND\_LAMBDA}(S, v, \mu_0; \text{Par}_1, \text{Par}_2)$ ;
5:      $\lambda^{\text{inc}} \leftarrow \min\{\lambda^{\text{inc}}, 1 - \lambda\}$ ;
6:      $\lambda \leftarrow \lambda + \lambda^{\text{inc}}$ ;
7:      $(v, \mu_0; \text{Par}_1, \text{Par}_2) \leftarrow \text{UPDATE\_BY\_LAMBDA}(\lambda^{\text{inc}}; v, \mu_0; \text{Par}_1, \text{Par}_2)$ ;
8:     if  $S^{\text{new}} = S \cup \{j\}$  then
9:        $(\text{Par}_1, \text{Par}_2) \leftarrow \text{UPDATE\_EXPAND\_SUPPORT}(\lambda, S, j; r, g^{(t)}, \text{Par}_1, \text{Par}_2)$ ;
10:    else if  $S^{\text{new}} = S \setminus \{j\}$  then
11:       $(\text{Par}_1, \text{Par}_2) \leftarrow \text{UPDATE\_SHRINK\_SUPPORT}(S, j; r, g^{(t)}, \text{Par}_1, \text{Par}_2)$ ;
12:    end if
13:     $S \leftarrow S^{\text{new}}$ .
14:  end while
15:   $\text{Par}_2 \leftarrow \text{DIRECT\_UPDATE}(S, r, g^{(t+1)}; \text{Par}_1, \text{Par}_2)$ ;
16:   $A \leftarrow A + g^{(t)}(g^{(t)})^T$ ;
17:   $x_S^{(t)} \leftarrow x_S, x_{S^c}^{(t)} \leftarrow 0$ .
18: end for

```

**Output:**  $x^{(1)}, x^{(2)}, \dots$

---

Putting the pieces together results in

$$\mu_0(\lambda) = \frac{D\mu_0 - \alpha(\lambda)D_{gr}D_g}{D - \alpha(\lambda)D_g^2} = \mu_0 + \frac{\alpha(\lambda)}{D - \alpha(\lambda)D_g^2} \cdot D_g(D_g\mu_0 - D_{gr}).$$

Plug  $\mu_0(\lambda)$  into (8), we obtain that

$$\begin{aligned}
x_S(\lambda) &= \mu_0(\lambda)\tilde{\eta}_S(\lambda) + A_{SS}(\lambda)^{-1}r_S \\
&= A_{SS}^{-1}r_S + \alpha(\lambda)D_{gr}\eta_S + (\mu_0(\lambda) - \mu_0)\tilde{\eta}_S(\lambda) + \mu_0\tilde{\eta}_S(\lambda) \\
&= x_S + \alpha(\lambda)D_{gr}\eta_S + (\mu_0(\lambda) - \mu_0)\tilde{\eta}_S(\lambda) + \mu_0(\tilde{\eta}_S(\lambda) - \tilde{\eta}_S) \\
&= x_S + \alpha(\lambda)D_{gr}\eta_S + \frac{\alpha(\lambda)}{D - \alpha(\lambda)D_g^2} \cdot D_g(D_g\mu_0 - D_{gr})\tilde{\eta}_S(\lambda) - \mu_0\alpha(\lambda)D_g\eta_S \quad [\text{Use LemmaB} - 1] \\
&= x_S + \frac{\alpha(\lambda)}{D - \alpha(\lambda)D_g^2} \cdot D_g(D_g\mu_0 - D_{gr})\tilde{\eta}_S(\lambda) - \alpha(\lambda)(D_g\mu_0 - D_{gr})\eta_S \\
&= x_S + \frac{\alpha(\lambda)}{D - \alpha(\lambda)D_g^2} \cdot (D_g\mu_0 - D_{gr}) \cdot (D_g\tilde{\eta}_S(\lambda) - (D - \alpha(\lambda)D_g^2)\eta_S) \\
&= x_S + \frac{\alpha(\lambda)}{D - \alpha(\lambda)D_g^2} \cdot (D_g\mu_0 - D_{gr}) \cdot (D_g\tilde{\eta}_S - \alpha(\lambda)D_g^2\eta_S - (D - \alpha(\lambda)D_g^2)\eta_S) \\
&= x_S + \frac{\alpha(\lambda)}{D - \alpha(\lambda)D_g^2} \cdot (D_g\mu_0 - D_{gr}) \cdot (D_g\tilde{\eta}_S - D\eta_S).
\end{aligned}$$

Similarly, it follows from (9) that

$$\begin{aligned}
-\mu_{S^c}(\lambda) &= \mu_0(\lambda)\tilde{\eta}_{S^c}(\lambda) + r_{S^c} + M_{S^cS}(\lambda)r_S \\
&= -\mu_{S^c} - \mu_0\tilde{\eta}_{S^c} + (M_{S^cS}(\lambda) - M_{S^cS})r_S + \mu_0(\lambda)\tilde{\eta}_{S^c}(\lambda)
\end{aligned}$$

$$\begin{aligned}
&= -\mu_{S^c} - \mu_0 \tilde{\eta}_{S^c} + \alpha(\lambda) D_{gr} \eta_{S^c} + \mu_0(\lambda) \tilde{\eta}_{S^c}(\lambda) \\
&= -\mu_{S^c} + \alpha(\lambda) D_{gr} \eta_{S^c} + (\mu_0(\lambda) - \mu_0) \tilde{\eta}_{S^c}(\lambda) + \mu_0(\tilde{\eta}_{S^c}(\lambda) - \tilde{\eta}_{S^c}) \\
&= -\mu_{S^c} + \alpha(\lambda) D_{gr} \eta_{S^c} + \frac{\alpha(\lambda)}{D - \alpha(\lambda) D_g^2} \cdot D_g (D_g \mu_0 - D_{gr}) \tilde{\eta}_{S^c}(\lambda) - \mu_0 \alpha(\lambda) D_g \eta_{S^c} \\
&= -\mu_{S^c} + \frac{\alpha(\lambda)}{D - \alpha(\lambda) D_g^2} \cdot D_g (D_g \mu_0 - D_{gr}) \tilde{\eta}_{S^c}(\lambda) - \alpha(\lambda) (D_g \mu_0 - D_{gr}) \eta_{S^c} \\
&= -\mu_{S^c} + \frac{\alpha(\lambda)}{D - \alpha(\lambda) D_g^2} \cdot (D_g \mu_0 - D_{gr}) (D_g \tilde{\eta}_{S^c}(\lambda) - (D - \alpha(\lambda) D_g^2) \eta_{S^c}) \\
&= -\mu_{S^c} + \frac{\alpha(\lambda)}{D - \alpha(\lambda) D_g^2} \cdot (D_g \mu_0 - D_{gr}) (D_g \tilde{\eta}_{S^c} - \alpha(\lambda) D_g^2 \eta_{S^c} - (D - \alpha(\lambda) D_g^2) \eta_{S^c}) \\
&= -\mu_{S^c} + \frac{\alpha(\lambda)}{D - \alpha(\lambda) D_g^2} \cdot (D_g \mu_0 - D_{gr}) (D_g \tilde{\eta}_{S^c} - D \eta_{S^c})
\end{aligned}$$

In sum,

$$\begin{pmatrix} x_S(\lambda) \\ -\mu_{S^c}(\lambda) \end{pmatrix} = \begin{pmatrix} x_S \\ -\mu_{S^c} \end{pmatrix} + \frac{\alpha(\lambda)}{D - \alpha(\lambda) D_g^2} \cdot (D_g \mu_0 - D_{gr}) \cdot (D_g \tilde{\eta} - D \eta).$$

■

Theorem B-4 indicates that searching for next  $\lambda$  is equivalent to solve  $n$  linear equations. In fact, (B-7) can be abbreviated as

$$v(\lambda) = v + \frac{\alpha(\lambda)}{D - \alpha(\lambda) D_g^2} u = \frac{Dv - (D_g^2 v - u) \alpha(\lambda)}{D - \alpha(\lambda) D_g^2},$$

for  $u = (D_g \mu_0 - D_{gr}) \cdot (D_g \tilde{\eta} - D \eta)$ . Let

$$\alpha = \min_+ \left\{ \frac{Dv_i}{D_g^2 v_i - u_i} : i = 1, 2, \dots, n \right\}$$

where  $\min_+(\Omega)$  denotes the minimum of all positive numbers contained in set  $\Omega$ . Then the target  $\lambda$  is the solution of  $\alpha(\lambda) = \alpha$ , i.e.

$$\lambda = \frac{\alpha}{1 - \alpha D_{gg}}.$$

We should emphasize that the right-handed side might be negative if  $\alpha D_{gg} \geq 1$  in which case  $v$  never hits 0. Thus, we should set  $\lambda$  to be infinity. The implementation of FIND\_LAMBDA is stated in Algorithm 2

## B-4 Variables Update

### B-4.1 UPDATE\_BY\_LAMBDA

Once the next  $\lambda$  has been calculated, all variables can be updated via Lemma B-1 and Theorem B-4.

### B-4.2 UPDATE\_EXPAND\_SUPPORT

Suppose  $S$  is updated to  $S \cup \{j\}$  for some  $j \in S^c$ . Denote  $\tilde{S}$  by  $S \cup \{j\}$  and we add a superscript  $+$  to each variable to denote the value after update. The key tool is the following formula showing the relation between matrix inverses after adding one row and one column.

**Proposition 1** Let  $\tilde{A}_{jj} = A_{jj} - A_{jS} A_{SS}^{-1} A_{Sj}$ ,

$$A_{\tilde{S}\tilde{S}}^{-1} = \begin{pmatrix} A_{SS}^{-1} & 0 \\ 0 & 0 \end{pmatrix} + \frac{1}{\tilde{A}_{jj}} \cdot \begin{pmatrix} -A_{SS}^{-1} A_{Sj} \\ 1 \end{pmatrix} \begin{pmatrix} -A_{jS} A_{SS}^{-1} & 1 \end{pmatrix}.$$

Similar to section 4.1, the key is to update  $M$  and other variables are easy to update based on  $M$ . Denote a class of operator  $\{\mathcal{R}_j : j \in S^c\}$  for matrix  $W \in \mathbb{R}^{n \times n}$ ,  $\mathcal{R}_j(W)$  sets the  $j$ -th row and  $j$ -th

---

**Algorithm 2** FIND\_LAMBDA
 

---

**Input:** Support  $S$ , iterate  $v = \begin{pmatrix} x_S \\ -\mu_{S^c} \end{pmatrix}$ ,  $\mu_0$ , intermediate variables  $\text{Par}_1, \text{Par}_2$ .

**Procedure:**

- 1:  $u \leftarrow (D_g \mu_0 - D_{gr})(D_g \tilde{\eta} - D\eta)$ ;
- 2:  $\alpha \leftarrow \min_+ \left\{ \frac{Dv_i}{D_g^2 v_i - u_i} : i = 1, 2, \dots, n \right\}$ ;
- 3:  $j \leftarrow \operatorname{argmin}_+ \left\{ \frac{Dv_i}{D_g^2 v_i - u_i} : i = 1, 2, \dots, n \right\}$ ;
- 4: **if**  $\alpha D_{gg} < 1$  **then**
- 5:      $\lambda^{\text{inc}} \leftarrow \frac{\alpha}{1 - \alpha D_{gg}}$ ;
- 6: **else**
- 7:      $\lambda^{\text{inc}} \leftarrow \infty$ ;
- 8: **end if**
- 9: **if**  $j \in S$  **then**
- 10:      $S^{\text{new}} = S \setminus \{j\}$ ;
- 11: **else**
- 12:      $S^{\text{new}} = S \cup \{j\}$ .
- 13: **end if**

**Output:**  $\lambda^{\text{inc}}, j, S^{\text{new}}$ .

---



---

**Algorithm 3** UPDATE\_BY\_LAMBDA
 

---

**Input:** Increment  $\lambda^{\text{inc}}$ ; iterate  $v = \begin{pmatrix} x_S \\ -\mu_{S^c} \end{pmatrix}$ ,  $\mu_0$ ; intermediate variables  $\text{Par}_1, \text{Par}_2$ .

**Procedure:**

- 1:  $\alpha_0 \leftarrow \frac{1}{1 + \lambda^{\text{inc}} \cdot D_{gg}}$ ;
- 2:  $\alpha \leftarrow \lambda^{\text{inc}} \cdot \alpha_0$ ;
- 3:  $\tilde{\alpha} \leftarrow \frac{\alpha}{D - \alpha D_g^2}$ ;
- 4:  $v \leftarrow v + \tilde{\alpha} \cdot (D_g \mu_0 - D_{gr})(D_g \tilde{\eta} - D\eta)$ ;
- 5:  $\mu_0 \leftarrow \mu_0 + \tilde{\alpha} \cdot D_g (D_g \mu_0 - D_{gr})$ ;
- 6:  $D \leftarrow D - \alpha D_g^2$ ;
- 7:  $(D_g, D_{gg}, D_{gr}) \leftarrow \alpha_0 (D_g, D_{gg}, D_{gr})$ .
- 8:  $M_{\cdot, S} \leftarrow M_{\cdot, S} - \alpha \eta \eta_S^T$ ;
- 9:  $\tilde{\eta} \leftarrow \tilde{\eta} - \alpha D_g \eta$ ;
- 10:  $\eta \leftarrow \alpha_0 \eta$ ;

**Output:**  $v, \mu_0, \text{Par}_1, \text{Par}_2$ .

---

column of  $W$  to be zero and for vector  $z \in \mathbb{R}^{n \times 1}$ ,  $\mathcal{R}_j(z)$  sets the  $j$ -th coordinate of  $z$  to be zero. One property of  $\mathcal{R}_j$  to be used is that For any matrix-vector pair  $(W, z)$ ,

$$\mathcal{R}_j(W)z = \mathcal{R}_j(Wz) - z_j \mathcal{R}_j(W_j) \quad (\text{B-8})$$

where  $W_j$  is  $j$ -th column of  $W$ .

**Theorem B-5** Let  $\gamma$  and  $\tilde{\gamma}$  be two  $n \times 1$  vectors with

$$\gamma_{\tilde{S}} = \tilde{\gamma}_{\tilde{S}} = (M_{jS} \quad 1)^T, \quad \gamma_{\tilde{S}^c} = -A_{\tilde{S}^c j} - A_{\tilde{S}^c S} M_{jS}^T, \quad \tilde{\gamma}_{\tilde{S}^c} = 0.$$

Then

$$M^+ = \mathcal{R}_j(M) + \frac{1}{\tilde{A}_{jj}} \cdot \gamma \tilde{\gamma}^T.$$

**Proof** By definition,

$$M_{\tilde{S}\tilde{S}}^+ = A_{\tilde{S}\tilde{S}}^{-1}, \quad M_{\tilde{S}^c \tilde{S}}^+ = -A_{\tilde{S}^c \tilde{S}} A_{\tilde{S}\tilde{S}}^{-1}.$$

By Proposition 1,

$$M_{\tilde{S}\tilde{S}}^+ = \begin{pmatrix} M_{SS} & 0 \\ 0 & 0 \end{pmatrix} + \frac{1}{\tilde{A}_{jj}} \begin{pmatrix} M_{jS}^T \\ 1 \end{pmatrix} (M_{jS} \quad 1) = \begin{pmatrix} M_{SS} & 0 \\ 0 & 0 \end{pmatrix} + \frac{1}{\tilde{A}_{jj}} \gamma_{\tilde{S}} \tilde{\gamma}_{\tilde{S}}^T,$$

and

$$\begin{aligned} M_{\tilde{S}^c \tilde{S}}^+ &= -(A_{\tilde{S}^c S} \quad A_{\tilde{S}^c j}) \left\{ \begin{pmatrix} M_{SS} & 0 \\ 0 & 0 \end{pmatrix} + \frac{1}{\tilde{A}_{jj}} \begin{pmatrix} M_{jS}^T \\ 1 \end{pmatrix} (M_{jS} \quad 1) \right\} \\ &= (M_{\tilde{S}^c S} \quad 0) + \frac{1}{\tilde{A}_{jj}} \gamma_{\tilde{S}^c} \tilde{\gamma}_{\tilde{S}}^T. \end{aligned}$$

Note that  $M_{\cdot, \tilde{S}^c}$  is always a zero matrix by definition, the above results imply that

$$M^+ = \mathcal{R}_j(M) + \frac{1}{\tilde{A}_{jj}} \cdot \gamma \tilde{\gamma}^T.$$

■

The update of other parameters can be derived as a consequence of Theorem B-5. Theorem B-6 summarizes the result.

**Theorem B-6** Let  $b_{j,S} = -r_S^T \gamma_{\tilde{S}}$ , then

- $\eta^+ = \mathcal{R}_j(\eta) + \frac{\eta_j}{\tilde{A}_{jj}} \gamma;$
- $\tilde{\eta}^+ = \mathcal{R}_j(\tilde{\eta}) + \frac{\tilde{\eta}_j}{\tilde{A}_{jj}} \gamma;$
- $D^+ = D + \frac{\tilde{\eta}_j^2}{\tilde{A}_{jj}}$
- $D_g^+ = D_g + \frac{\eta_j \tilde{\eta}_j}{\tilde{A}_{jj}};$
- $D_{gg}^+ = D_{gg} + \frac{\eta_j^2}{\tilde{A}_{jj}};$
- $D_{gr}^+ = D_{gr} + \frac{\eta_j b_{j,S}}{\tilde{A}_{jj}};$

**Proof** Since  $M_j = 0$ , (B-8) implies that for any  $z \in \mathbb{R}^{n \times 1}$

$$\mathcal{R}_j(Mz) = \mathcal{R}_j(M)z.$$

By definition,

$$\eta = \begin{pmatrix} 0 \\ g_{S^c} \end{pmatrix} + Mg, \quad \tilde{\eta} = \begin{pmatrix} 0 \\ \mathbf{1}_{S^c} \end{pmatrix} + M\mathbf{1}.$$

Also notice that  $\tilde{\gamma}_{\tilde{S}}^T g_{\tilde{S}} = g_j + M_{jS}^T \mathbf{1}_S = \eta_j$  and  $\tilde{\gamma}_{\tilde{S}}^T \mathbf{1}_{\tilde{S}} = 1 + M_{jS} \mathbf{1}_S = \tilde{\eta}_j$ , thus,

$$\begin{aligned} \eta^+ &= \begin{pmatrix} 0 \\ g_{\tilde{S}^c} \end{pmatrix} + M^+ g = \begin{pmatrix} 0 \\ g_{\tilde{S}^c} \end{pmatrix} + \mathcal{R}_j(M)g + \frac{\tilde{\gamma}_{\tilde{S}}^T g}{\tilde{A}_{jj}} \gamma \\ &= \begin{pmatrix} 0 \\ g_{\tilde{S}^c} \end{pmatrix} + \mathcal{R}_j(Mg) + \frac{\tilde{\gamma}_{\tilde{S}}^T g_{\tilde{S}}}{\tilde{A}_{jj}} \gamma \\ &= \begin{pmatrix} 0 \\ g_{\tilde{S}^c} \end{pmatrix} + \mathcal{R}_j(\eta) - \mathcal{R}_j \left( \begin{pmatrix} 0 \\ g_{S^c} \end{pmatrix} \right) + \frac{\eta_j}{\tilde{A}_{jj}} \gamma \\ &= \begin{pmatrix} 0 \\ g_{\tilde{S}^c} \end{pmatrix} + \mathcal{R}_j(\eta) - \begin{pmatrix} 0 \\ g_{\tilde{S}^c} \end{pmatrix} + \frac{\eta_j}{\tilde{A}_{jj}} \gamma \\ &= \mathcal{R}_j(\eta) + \frac{\eta_j}{\tilde{A}_{jj}} \gamma. \end{aligned}$$

The update of  $\tilde{\eta}$  can be obtained by replacing  $g$  by  $\mathbf{1}$  in the above derivation. The four scalars  $D, D_g, D_{gg}, D_{gr}$  can be updated as follows.

$$D^+ = \mathbf{1}_{\tilde{S}}^T \tilde{\eta}_{\tilde{S}}^+ = \mathbf{1}_{\tilde{S}}^T \left( \mathcal{R}_j(\tilde{\eta})_{\tilde{S}} + \frac{\tilde{\eta}_j}{\tilde{A}_{jj}} \gamma_{\tilde{S}} \right) = D + \frac{\tilde{\eta}_j^2}{\tilde{A}_{jj}};$$

$$\begin{aligned}
D_g^+ &= \mathbf{1}_{\tilde{S}}^T \eta_{\tilde{S}}^+ = \mathbf{1}_{\tilde{S}}^T \left( \mathcal{R}_j(\eta)_{\tilde{S}} + \frac{\eta_j}{\tilde{A}_{jj}} \gamma_{\tilde{S}} \right) = D_g + \frac{\tilde{\eta}_j \eta_j}{\tilde{A}_{jj}}; \\
D_{gg}^+ &= g_{\tilde{S}}^T \eta_{\tilde{S}}^+ = g_{\tilde{S}}^T \left( \mathcal{R}_j(\eta)_{\tilde{S}} + \frac{\eta_j}{\tilde{A}_{jj}} \gamma_{\tilde{S}} \right) = D_{gg} + \frac{\eta_j^2}{\tilde{A}_{jj}}; \\
D_{gr}^+ &= -r_{\tilde{S}}^T \eta_{\tilde{S}}^+ = -r_{\tilde{S}}^T \left( \mathcal{R}_j(\eta)_{\tilde{S}} + \frac{\eta_j}{\tilde{A}_{jj}} \gamma_{\tilde{S}} \right) = D_{gr} - \frac{\eta_j}{\tilde{A}_{jj}} r_{\tilde{S}}^T \gamma_{\tilde{S}} \\
&= D_{gr} + \frac{\eta_j b_{j,S}}{\tilde{A}_{jj}}.
\end{aligned}$$

■

The implementation of UPDATE\_EXPAND\_SUPPORT is summarized in Algorithm 4. Note that both  $\tilde{A}_{jj}$  and  $\gamma_{\tilde{S}^c}$  depends on  $\lambda$  and it is easy to see that

$$\begin{aligned}
\tilde{A}_{jj}(\lambda) &= A_{jj} + \lambda g_j^2 + M_{jS}(A_{Sj} + \lambda g_j g_S) = A_{jj} + M_{jS} A_{Sj} + \lambda g_j \eta_j \\
\gamma_{\tilde{S}^c}(\lambda) &\leftarrow -(A_{\tilde{S}^c j} + \lambda g_{\tilde{S}^c} g_j) - (A_{\tilde{S}^c S} + \lambda g_{\tilde{S}^c} g_S^T) M_{jS}^T = -A_{\tilde{S}^c j} - A_{\tilde{S}^c S} M_{jS}^T - \lambda \eta_j g_{\tilde{S}^c}.
\end{aligned}$$

---

**Algorithm 4** UPDATE\_EXPAND\_SUPPORT

---

**Inputs:** Current  $\lambda$ , original support  $S$ , new index  $j$ , matrix  $A$ , vectors  $y, r, g$ , intermediate variables  $\text{Par}_1, \text{Par}_2$ .

**Procedure:**

- 1:  $\tilde{A}_{jj} \leftarrow A_{jj} + M_{jS} A_{Sj} + \lambda g_j \eta_j$ ;
- 2:  $\gamma_{\tilde{S}} \leftarrow (M_{jS}, \mathbf{1})^T, \gamma_{\tilde{S}^c} \leftarrow -A_{\tilde{S}^c j} - A_{\tilde{S}^c S} M_{jS}^T - \lambda \eta_j g_{\tilde{S}^c}$ ;
- 3:  $\tilde{\gamma}_{\tilde{S}} \leftarrow (M_{jS}, \mathbf{1})^T, \tilde{\gamma}_{\tilde{S}^c} \leftarrow 0$ ;
- 4:  $b \leftarrow -r_{\tilde{S}}^T \gamma_{\tilde{S}}$ ;
- 5:  $D \leftarrow D + \frac{\eta_j^2}{\tilde{A}_{jj}}$ ;
- 6:  $D_g \leftarrow D_g + \frac{\eta_j \tilde{\eta}_j}{\tilde{A}_{jj}}$ ;
- 7:  $D_{gg} \leftarrow D_{gg} + \frac{\eta_j^2}{\tilde{A}_{jj}}$ ;
- 8:  $D_{gr} \leftarrow D_{gr} + \frac{\eta_j b}{\tilde{A}_{jj}}$ ;
- 9:  $M_{\cdot, \tilde{S}} \leftarrow \mathcal{R}_j(M_{\cdot, \tilde{S}}) + \frac{1}{\tilde{A}_{jj}} \gamma \tilde{\gamma}_{\tilde{S}}^T$ ;
- 10:  $\eta \leftarrow \mathcal{R}_j(\eta) + \frac{\eta_j}{\tilde{A}_{jj}} \gamma$ .
- 11:  $\tilde{\eta} \leftarrow \mathcal{R}_j(\tilde{\eta}) + \frac{\tilde{\eta}_j}{\tilde{A}_{jj}} \gamma$ ;

**Output:**  $\text{Par}_1, \text{Par}_2$ .

---

**B-4.3** UPDATE\_SHRINK\_SUPPORT

Suppose  $S$  is updated to  $S \setminus \{j\}$  for some  $j \in S^c$ . Denote  $\tilde{S}$  by  $S \setminus \{j\}$  and we add a superscript  $-$  to each variable to denote the value after update. Similar to last subsection, we start from deriving  $M^-$  and apply the result to calculate other variables.

**Theorem B-7** Let  $\beta$  and  $\tilde{\beta}$  be two  $n \times 1$  vectors with

$$\beta_{\tilde{S}} = \tilde{\beta}_{\tilde{S}} = M_{\tilde{S}j}, \quad \beta_{\tilde{S}^c} = \begin{pmatrix} -1 \\ M_{S^c j} \end{pmatrix}, \quad \tilde{\beta}_{\tilde{S}^c} = 0.$$

Then

$$M^- = \mathcal{R}_j(M) - \frac{1}{M_{jj}} \cdot \beta \tilde{\beta}^T.$$



**Proof** By definition,

$$\begin{pmatrix} M_{\tilde{S}\tilde{S}} & M_{\tilde{S}j} \\ M_{j\tilde{S}} & M_{jj} \end{pmatrix} = A_{S\tilde{S}}^{-1} = \begin{pmatrix} A_{\tilde{S}\tilde{S}} & A_{\tilde{S}j} \\ A_{j\tilde{S}} & A_{jj} \end{pmatrix}^{-1}.$$

Then Proposition 1 implies that

$$\begin{pmatrix} M_{\tilde{S}\tilde{S}} & M_{\tilde{S}j} \\ M_{j\tilde{S}} & M_{jj} \end{pmatrix} = \begin{pmatrix} A_{\tilde{S}\tilde{S}}^{-1} & 0 \\ 0 & 0 \end{pmatrix} + \frac{1}{A_{jj} - A_{j\tilde{S}}A_{\tilde{S}\tilde{S}}^{-1}A_{\tilde{S}j}} \cdot \begin{pmatrix} -A_{\tilde{S}\tilde{S}}^{-1}A_{\tilde{S}j} \\ 1 \end{pmatrix} \begin{pmatrix} -A_{j\tilde{S}}A_{\tilde{S}\tilde{S}}^{-1} & 1 \end{pmatrix}. \quad (\text{B-9})$$

This entails that

$$A_{\tilde{S}\tilde{S}}^{-1} = M_{\tilde{S}\tilde{S}} - \frac{M_{\tilde{S}j}M_{j\tilde{S}}}{M_{jj}}, \quad -A_{j\tilde{S}}A_{\tilde{S}\tilde{S}}^{-1} = \frac{M_{j\tilde{S}}}{M_{jj}}. \quad (\text{B-10})$$

On the other hand,

$$\begin{aligned} (M_{S^c\tilde{S}} \quad M_{S^c j}) &= -A_{S^c S} A_{S\tilde{S}}^{-1} = -(A_{S^c\tilde{S}} \quad A_{S^c j}) \begin{pmatrix} M_{\tilde{S}\tilde{S}} & M_{\tilde{S}j} \\ M_{j\tilde{S}} & M_{jj} \end{pmatrix} \\ &= -(A_{S^c\tilde{S}}M_{\tilde{S}\tilde{S}} + A_{S^c j}M_{j\tilde{S}} \quad A_{S^c\tilde{S}}M_{\tilde{S}j} + A_{S^c j}M_{jj}). \end{aligned} \quad (\text{B-11})$$

If follows from (B-9), (B-10) and (B-11) that

$$\begin{aligned} -A_{S^c\tilde{S}}A_{\tilde{S}\tilde{S}}^{-1} &= -A_{S^c\tilde{S}} \left( M_{\tilde{S}\tilde{S}} - \frac{M_{\tilde{S}j}M_{j\tilde{S}}}{M_{jj}} \right) \\ &= M_{S^c\tilde{S}} + A_{S^c j}M_{j\tilde{S}} + \frac{A_{S^c\tilde{S}}M_{\tilde{S}j}M_{j\tilde{S}}}{M_{jj}} \\ &= M_{S^c\tilde{S}} + (A_{S^c j}M_{jj} + A_{S^c\tilde{S}}M_{\tilde{S}j}) \frac{M_{j\tilde{S}}}{M_{jj}} \\ &= M_{S^c\tilde{S}} - \frac{M_{S^c j}M_{j\tilde{S}}}{M_{jj}}. \end{aligned} \quad (\text{B-12})$$

Putting (B-10) and (B-11) together, we obtain that

$$M_{\cdot, \tilde{S}}^- = \begin{pmatrix} A_{\tilde{S}\tilde{S}}^{-1} \\ -A_{\tilde{S}^c\tilde{S}}A_{\tilde{S}\tilde{S}}^{-1} \end{pmatrix} = \begin{pmatrix} A_{\tilde{S}\tilde{S}}^{-1} \\ -A_{j\tilde{S}}A_{\tilde{S}\tilde{S}}^{-1} \\ -A_{S^c\tilde{S}}A_{\tilde{S}\tilde{S}}^{-1} \end{pmatrix} = \mathcal{R}_j(M)_{\cdot, \tilde{S}} - \frac{1}{M_{jj}} \cdot \beta\tilde{\beta}^T.$$

Since  $M_{\cdot, \tilde{S}^c}$  is a zero matrix,

$$M^- = \mathcal{R}_j(M) - \frac{1}{M_{jj}} \cdot \beta\tilde{\beta}^T. \quad \blacksquare$$

**Theorem B-8** Let  $\tilde{b}_{j,S} = -r_{\tilde{S}}^T \beta_{\tilde{S}} - r_j M_{jj}$ , then

- $\eta^- = \mathcal{R}_j(\eta) - \frac{\eta_j}{M_{jj}}\beta;$
- $\tilde{\eta}^- = \mathcal{R}_j(\tilde{\eta}) - \frac{\tilde{\eta}_j}{M_{jj}}\beta;$
- $D^- = D - \frac{\tilde{\eta}_j^2}{M_{jj}};$
- $D_g^- = D_g - \frac{\eta_j \tilde{\eta}_j}{M_{jj}};$
- $D_{gg}^- = D_{gg} - \frac{\eta_j^2}{M_{jj}};$
- $D_{gr}^- = D_{gr} - \frac{\eta_j \tilde{b}_{j,S}}{M_{jj}}.$

---

**Algorithm 5** UPDATE\_SHRINK\_SUPPORT

---

**Inputs:** Original support  $S$ , new index  $j$ , matrix  $A$ , vector  $y, r, g$ , intermediate variables  $\text{Par}_1, \text{Par}_2$ .

**Procedure:**

- 1:  $\beta_{\tilde{S}} \leftarrow M_{j\tilde{S}}^T, \beta_{\tilde{S}^c} \leftarrow \begin{pmatrix} -1 \\ M_{\tilde{S}^c j} \end{pmatrix}, \tilde{\beta}_{\tilde{S}} \leftarrow M_{j\tilde{S}}^T, \tilde{\beta}_{\tilde{S}^c} \leftarrow 0;$
- 2:  $\tilde{b} \leftarrow -r_{\tilde{S}}^T \beta_{\tilde{S}} - r_j M_{jj};$
- 3:  $D \leftarrow D - \frac{\tilde{\eta}_j^2}{M_{jj}};$
- 4:  $D_g \leftarrow D_g - \frac{\eta_j \tilde{\eta}_j}{M_{jj}};$
- 5:  $D_{gg} \leftarrow D_{gg} - \frac{\eta_j^2}{M_{jj}};$
- 6:  $D_{gr} \leftarrow D_{gr} - \frac{\eta_j \tilde{b}}{M_{jj}};$
- 7:  $M_{\cdot, \tilde{S}} \leftarrow \mathcal{R}_j(M_{\cdot, \tilde{S}}) - \frac{1}{M_{jj}} \beta \tilde{\beta}_{\tilde{S}}^T, M_{\cdot, j} \leftarrow 0;$
- 8:  $\eta \leftarrow \mathcal{R}_j(\eta) - \frac{\eta_j}{M_{jj}} \beta;$
- 9:  $\tilde{\eta} \leftarrow \mathcal{R}_j(\tilde{\eta}) - \frac{\tilde{\eta}_j}{M_{jj}} \beta.$

**Output:**  $\text{Par}_1, \text{Par}_2.$ 

---

**Proof** By (B-8),

$$\mathcal{R}_j(M)g = \mathcal{R}_j(Mg) - g_j \mathcal{R}_j(M_{\cdot, j})$$

Let  $e_j$  is the  $j$ -th basis vector with  $j$ -th entry equal to 1 and all other entries equal to 0. Then

$$\begin{aligned} \eta^- &= \begin{pmatrix} 0 \\ g_{\tilde{S}^c} \end{pmatrix} + M^- g = \begin{pmatrix} 0 \\ g_{\tilde{S}^c} \end{pmatrix} + \mathcal{R}_j(M)g - \frac{\tilde{\beta}_{\tilde{S}}^T g}{M_{jj}} \beta \\ &= \begin{pmatrix} 0 \\ g_{\tilde{S}^c} \end{pmatrix} + \mathcal{R}_j(Mg) - g_j \mathcal{R}_j(M_{\cdot, j}) - \frac{\tilde{\beta}_{\tilde{S}}^T g_{\tilde{S}}}{M_{jj}} \beta \\ &= \begin{pmatrix} 0 \\ g_{\tilde{S}^c} \end{pmatrix} + \mathcal{R}_j(Mg) - g_j e_j - g_j \beta - \frac{\tilde{\beta}_{\tilde{S}}^T g_{\tilde{S}}}{M_{jj}} \beta \\ &= \begin{pmatrix} 0 \\ g_{\tilde{S}^c} \end{pmatrix} + \mathcal{R}_j(Mg) - g_j e_j - \frac{M_{jS} g_S}{M_{jj}} \beta \\ &= \begin{pmatrix} 0 \\ g_{\tilde{S}^c} \end{pmatrix} + \mathcal{R}_j(\eta) - \mathcal{R}_j \left( \begin{pmatrix} 0 \\ g_{S^c} \end{pmatrix} \right) - g_j e_j - \frac{\eta_j}{M_{jj}} \beta \\ &= \begin{pmatrix} 0 \\ g_{\tilde{S}^c} \end{pmatrix} + \mathcal{R}_j(\eta) - \begin{pmatrix} 0 \\ g_{S^c} \end{pmatrix} - g_j e_j - \frac{\eta_j}{M_{jj}} \beta \\ &= \mathcal{R}_j(\eta) - \frac{\eta_j}{M_{jj}} \beta. \end{aligned}$$

Substitute  $g$  by  $\mathbf{1}$ , we obtain the update for  $\tilde{\eta}$ . Together with (B-10) and the fact that  $j \in S$ , we obtain that

$$\begin{aligned} D^- &= \mathbf{1}_{\tilde{S}}^T \tilde{\eta}_{\tilde{S}}^- = \mathbf{1}_{\tilde{S}}^T \left( \tilde{\eta}_{\tilde{S}} - \frac{\tilde{\eta}_j}{M_{jj}} \beta_{\tilde{S}} \right) = D - \tilde{\eta}_j - \frac{\tilde{\eta}_j}{M_{jj}} (\mathbf{1}_{\tilde{S}}^T M_{\tilde{S}j}) \\ &= D - \frac{\tilde{\eta}_j}{M_{jj}} (M_{jj} + \mathbf{1}_{\tilde{S}}^T M_{\tilde{S}j}) = D - \frac{\tilde{\eta}_j^2}{M_{jj}}; \\ D_g^- &= \mathbf{1}_{\tilde{S}}^T \eta_{\tilde{S}}^- = \mathbf{1}_{\tilde{S}}^T \left( \eta_{\tilde{S}} - \frac{\eta_j}{M_{jj}} \beta_{\tilde{S}} \right) = D_g - \eta_j - \frac{\eta_j}{M_{jj}} (\mathbf{1}_{\tilde{S}}^T M_{\tilde{S}j}) \\ &= D_g - \frac{\eta_j}{M_{jj}} (M_{jj} + \mathbf{1}_{\tilde{S}}^T M_{\tilde{S}j}) = D_g - \frac{\eta_j \tilde{\eta}_j}{M_{jj}}; \\ D_{gg}^- &= g_{\tilde{S}}^T \eta_{\tilde{S}}^- = g_{\tilde{S}}^T \left( \eta_{\tilde{S}} - \frac{\eta_j}{M_{jj}} \beta_{\tilde{S}} \right) = D_{gg} - g_j \eta_j - \frac{\eta_j}{M_{jj}} (g_{\tilde{S}}^T M_{\tilde{S}j}) \end{aligned}$$

$$\begin{aligned}
&= D_{gg} - \frac{\eta_j}{M_{jj}}(g_j M_{jj} + g_{\tilde{S}}^T M_{\tilde{S}j}) = D_{gg} - \frac{\eta_j^2}{M_{jj}}; \\
D_{gr}^- &= -r_{\tilde{S}}^T \eta_{\tilde{S}}^- = -r_{\tilde{S}}^T \left( \eta_{\tilde{S}} - \frac{\eta_j}{M_{jj}} \beta_{\tilde{S}} \right) = -r_{\tilde{S}}^T \eta_S + r_j \eta_j + \frac{\eta_j}{M_{jj}} r_{\tilde{S}}^T \beta_{\tilde{S}} \\
&= D_{gr} - \frac{\eta_j \tilde{b}_{j,S}}{M_{jj}}.
\end{aligned}$$

■

The implementation of UPDATE\_SHRINK\_SUPPORT is summarized in Algorithm 5.

#### B-4.4 DIRECT\_UPDATE

At the beginning of each time  $t$ , we need to recompute  $\text{Par}_2 = \{\eta, D_g, D_{gg}, D_{gr}\}$ . The implementation is summarized in Algorithm 6.

---

#### Algorithm 6 DIRECT\_UPDATE

---

**Inputs:** Support  $S$ , vector  $y, r, g$ , intermediate variables  $\text{Par}_1, \text{Par}_2$ .

**Procedure:**

- 1:  $\eta_S \leftarrow M_{SS} g_S, \eta_{S^c} \leftarrow g_{S^c} + M_{S^c S} g_S$ ;
- 2:  $D_g \leftarrow \mathbf{1}_S^T \eta_S$ ;
- 3:  $D_{gg} \leftarrow \eta_S^T g_S$ ;
- 4:  $D_{gr} \leftarrow -\eta_S^T r_S$ .

**Output:**  $\text{Par}_2$ .

---

#### B-5 Update of $A$

As will be shown in next subsection, the complexities of all above sub-routines are at most  $O(ns)$  where  $s = |S|$ . However, the complexity of line 16 is  $O(n^2)$  which might dominate when the solution is sparse and the number of turning points is small. Fortunately, UPDATE\_EXPAND\_SUPPORT is the only sub-routine which extracts information from  $A$ . In fact, in line 1 and line 2,

$$\begin{pmatrix} \tilde{A}_{jj} \\ \gamma_{\tilde{S}^c} \end{pmatrix} = \begin{pmatrix} A_{jj} + M_{jS} A_{Sj} \\ -A_{\tilde{S}^c j} - A_{\tilde{S}^c S} M_{jS}^T \end{pmatrix} + \lambda \eta_j \begin{pmatrix} g_j \\ g_{\tilde{S}^c} \end{pmatrix}.$$

This only requires the  $j$ -th column of  $A$ . Let  $S_*$  be the union of all supports appeared in Algorithm 1. Suppose we know  $S_*$  apriori, we can only update the columns of  $A$  with indices in  $S_*$ . In other words, we update  $A_{\cdot, S_*}$  by  $A_{\cdot, S_*} + \lambda g g_{S_*}^T$  at the beginning of each step and hence the complexity is reduced to  $O(n|S_*|)$ .

Although agnostic to  $S_*$  in reality, we can initialize it by  $\text{supp}(x_k)$  for some positive  $k$ , e.g.  $k = 1$ , and keep track it by adding index into  $S_*$  once the index is not included in  $S_*$ . Once a new index  $j$  is detected, we update  $j$ -th column of  $A$  by using all previous  $g^{(t)}$ . The implementation is stated in Algorithm 7.

#### B-6 Complexity Analysis

In this subsection, we analyze the complexity of the algorithm. We distinguish four types of computation, namely matrix-vector product, outer-product of two vectors, inner-product of two vectors and vector-scalar product. Denote by  $W \in \mathbb{R}^{m \times p}$ ,  $(z, \tilde{z}) \in \mathbb{R}^p \times \mathbb{R}^q$  and  $a \in \mathbb{R}$  the generic matrix, vector and scalar respectively. As a convention, the complexity is defined as the number of scalar-scalar multiplications. The addition is omitted here for simplicity. Note that the complexities of  $Wz$ ,  $z\tilde{z}^T$ ,  $z^T z$  and  $az$  are  $mp$ ,  $pq$ ,  $p$  and  $p$ , respectively. The results for a single step are summarized in Table 1 where  $s_* = |S_*|$  be the size of  $S_*$  at the final round. We should emphasize that our complexity analysis is exact.

---

<sup>1</sup> $S_*$  might be updated, in which step  $nt$ -computations are involved in line 17 of Algorithm 7. However, on average,  $ns_*$  computations are involved since  $s_*$  represents the size of  $S_*$  at the last round.

---

**Algorithm 7** HONES Algorithm for time-varying  $A$  and fixed  $r$  with sparse update of  $A$ 


---

**Inputs:** Initial matrix  $A^{(0)}$ , vectors  $r$ , matrix-update-vectors  $\{g^{(t)}, t = 1, 2, \dots\}$ .

**Initialization:**

$x \leftarrow$  as the optimum corresponding to  $A^{(0)}$ ;  
 $S \leftarrow \text{supp}(x)$ ,  $S_* \leftarrow S$ ;  
Calculate  $(x, \mu, \mu_0)$  via (8)-(10)  
 $v_S \leftarrow x_S$ ,  $v_{S^c} \leftarrow -\mu_{S^c}$ ;  
Calculate intermediate variables  $(\text{Par}_1, \text{Par}_2)$  via (B-1)-(B-3) based on  $g^{(1)}$ .

**Procedure:**

```

1: for  $t = 1, 2, \dots$  do
2:    $\lambda \leftarrow 0$ ;
3:   while  $\lambda < 1$  do
4:      $(\lambda^{\text{inc}}, j, S^{\text{new}}) \leftarrow \text{FIND\_LAMBDA}(S, v; \text{Par}_1, \text{Par}_2)$ ;
5:      $\lambda^{\text{inc}} \leftarrow \min\{\lambda^{\text{inc}}, 1 - \lambda\}$ ;
6:      $\lambda \leftarrow \lambda + \lambda^{\text{inc}}$ ;
7:      $(v, \mu_0; \text{Par}_1, \text{Par}_2) \leftarrow \text{UPDATE\_BY\_LAMBDA}(\lambda^{\text{inc}}; v, \mu_0; \text{Par}_1, \text{Par}_2)$ ;
8:     if  $S^{\text{new}} = S \cup \{j\}$  then
9:        $(\text{Par}_1, \text{Par}_2) \leftarrow \text{UPDATE\_EXPAND\_SUPPORT}(\lambda, S, j; A, r, g^{(t)}; \text{Par}_1, \text{Par}_2)$ ;
10:      if  $j \notin S_*$  then
11:         $G \leftarrow (g^{(1)}, \dots, g^{(t-1)})$ ;
12:         $A_{\cdot, j} \leftarrow A_{\cdot, j} + GG_{j, \cdot}^T$ ;
13:         $S_* = S_* \cup \{j\}$ ;
14:      end if
15:    else if  $S^{\text{new}} = S \setminus \{j\}$  then
16:       $(\text{Par}_1, \text{Par}_2) \leftarrow \text{UPDATE\_SHRINK\_SUPPORT}(S, j; r, g^{(t)}; \text{Par}_1, \text{Par}_2)$ ;
17:    end if
18:     $S \leftarrow S^{\text{new}}$ .
19:  end while
20:   $\text{Par}_2 \leftarrow \text{DIRECT\_UPDATE}(S, r, g^{(t+1)}; \text{Par}_1, \text{Par}_2)$ ;
21:   $A_{\cdot, S_*} \leftarrow A_{\cdot, S_*} + g^{(t)}(g_{S_*}^{(t)})^T$ ;
22:   $x_S^{(t)} \leftarrow x_S$ ,  $x_{S^c}^{(t)} \leftarrow 0$ .
23: end for

```

**Output:**  $x^{(1)}, x^{(2)}, \dots$

---

Table 1: Computation complexity of each sub-routine in Algorithm 1.

|                              | $(Wz)$ -type   | $(z\tilde{z}^T)$ -type | $(z^T z)$ -type | $(az)$ -type |
|------------------------------|----------------|------------------------|-----------------|--------------|
| FIND_LAMBDA                  | 0              | 0                      | $n$             | $2n$         |
| UPDATE_BY_LAMBDA             | 0              | $ns$                   | 0               | $4n$         |
| UPDATE_EXPAND_SUPPORT        | $s(n - s - 1)$ | $n(s + 1)$             | $n$             | $2n$         |
| UPDATE_SHRINK_SUPPORT        | 0              | $n(s - 1)$             | $n$             | $2n$         |
| DIRECT_UPDATE                | $ns$           | 0                      | $n + s$         | 0            |
| Update <sup>1</sup> of $A$ . | 0              | $ns_*$                 | 0               | 0            |

For given  $t$ , denote  $k_A^+$  by the number of turning points which add element to  $S$  and  $k_A^-$  by the number of turning points which delete element from  $S$ . Let  $k_A = k_A^+ + k_A^-$  be the total number of turning points and  $s$  be the maximum size of  $S$  in the iteration. Then the complexity of HONES for a single time  $t$  is at most

$$ns(3k_A^+ + 2k_A^-) + n(12k_A^+ + 10k_A^-) + O(k_A),$$

Therefore, the complexity at time  $t$  is at most

$$C_{1t} \leq ns_* + ns(3k_A^+ + 2k_A^- + 1) + n(12k_A^+ + 10k_A^- + 2) + O(k_A) \leq ns_* + ns(3k_A + 1) + n(12k_A + 2) + O(k_A).$$

## C Implementation of HONES Algorithm With Time-Varying $r$ and Fixed $A$

### C-1 Intermediate Variables

Similar to Appendix B, we define  $\text{Par}_1 = \{M, \tilde{\eta}, D\}$  where the parameters are defined in (B-1)-(B-3). Moreover, we define a vector  $\xi$  such that

$$\xi_S = -A_{SS}^{-1}\ell_S, \quad \xi_{S^c} = -\ell_{S^c} + A_{S^cS}A_{SS}^{-1}\ell_S,$$

and a scalar  $D_\ell$  as

$$D_\ell = \mathbf{1}_S^T \xi_S.$$

We write  $\text{Par}_3$  for  $\{\xi, D_\ell\}$  for convenience.

### C-2 Implementation

Algorithm 8 describes the full implementation in this case and the sub-routines will be discussed separately in following subsections.

---

**Algorithm 8** HONES Algorithm for constant  $A, y$  and time-varying  $r$

---

**Inputs:** Initial matrix  $A$ , vector  $r^{(0)}$ , vector-update-vector  $\{\ell^{(t)} = r^{(t)} - r^{(t-1)} : t = 1, 2, \dots\}$ .

**Initialization:**

- $x \leftarrow$  as the optimum corresponding to  $r^{(0)}$ .
- $S \leftarrow \text{supp}(x)$ ;
- Calculate  $(x, \mu, \mu_0)$  via (8)-(10)
- $v_S \leftarrow x_S, v_{S^c} \leftarrow -\mu_{S^c}$ ;
- Calculate intermediate variables  $\text{Par}_1, \text{Par}_3$  via (B-1)-(B-3) based on  $\ell^{(1)}$ .

**Procedure:**

- 1: **for**  $t = 1, 2, \dots$  **do**
- 2:    $\underline{\lambda} \leftarrow 0$ ;
- 3:   **while**  $\underline{\lambda} < 1$  **do**
- 4:      $(\underline{\lambda}^{\text{inc}}, j, S^{\text{new}}) \leftarrow \text{FIND\_UTILDE\_LAMBDA}(S, v; \text{Par}_1, \text{Par}_3)$ ;
- 5:      $\underline{\lambda}^{\text{inc}} \leftarrow \min\{\underline{\lambda}^{\text{inc}}, 1 - \underline{\lambda}\}$ ;
- 6:      $(v, \mu_0; \text{Par}_1, \text{Par}_3) \leftarrow \text{UPDATE\_BY\_UTILDE\_LAMBDA}(\underline{\lambda}^{\text{inc}}; v, \mu_0, \text{Par}_1, \text{Par}_3)$ ;
- 7:     **if**  $S^{\text{new}} = S \cup \{j\}$  **then**
- 8:        $(\text{Par}_1, \text{Par}_3) \leftarrow \text{UPDATE\_UTILDE\_EXPAND\_SUPPORT}(S, j, A, \ell; \text{Par}_1, \text{Par}_3)$ ;
- 9:     **else if**  $S^{\text{new}} = S \setminus \{j\}$  **then**
- 10:        $(\text{Par}_1, \text{Par}_3) \leftarrow \text{UPDATE\_UTILDE\_SHRINK\_SUPPORT}(S, j, \ell; \text{Par}_1, \text{Par}_3)$ ;
- 11:     **end if**
- 12:      $S \leftarrow S^{\text{new}}$ ;
- 13:      $\underline{\lambda} \leftarrow \underline{\lambda} + \underline{\lambda}^{\text{inc}}$ .
- 14:   **end while**
- 15:    $\text{Par}_3 \leftarrow \text{DIRECT\_UTILDE\_UPDATE}(S, \text{Par}_1, h^{(t+1)})$ ;
- 16:    $x_S^{(t)} \leftarrow x_S, \quad x_{S^c}^{(t)} \leftarrow 0$ .
- 17: **end for**

**Output:**  $x^{(1)}, x^{(2)}, \dots$

---

### C-3 FIND\_UTILDE\_LAMBDA

Define  $v$  as in (B-5). Then Theorem E-11 implies that

$$v(\underline{\lambda}) = v(0) - \left( \xi - \frac{D_\ell}{D} \tilde{\eta} \right) \underline{\lambda}, \quad \mu_0(\underline{\lambda}) = \mu_0 + \frac{D_\ell}{D} \underline{\lambda}.$$

Thus, searching for  $\underline{\lambda}$  is equivalent to solve simple linear equations. Algorithm 9

---

#### Algorithm 9 FIND\_UTILDE\_LAMBDA

---

**Input:** Support  $S$ , iterate  $v = \begin{pmatrix} x_S \\ -\mu_{S^c} \end{pmatrix}$ , intermediate variables  $\text{Par}_1, \text{Par}_3$ .

**Procedure:**

- 1:  $\underline{\lambda}^{\text{inc}} \leftarrow \min_+ \left\{ \frac{v_i}{\xi_i - \frac{D_\ell}{D} \tilde{\eta}_i} : i = 1, 2, \dots, n \right\}$ ;
- 2:  $j \leftarrow \operatorname{argmin}_+ \left\{ \frac{v_i}{\xi_i - \frac{D_\ell}{D} \tilde{\eta}_i} : i = 1, 2, \dots, n \right\}$ ;
- 3: **if**  $j \in S$  **then**
- 4:      $S^{\text{new}} = S \setminus \{j\}$ ;
- 5: **else**
- 6:      $S^{\text{new}} = S \cup \{j\}$ .
- 7: **end if**

**Output:**  $\underline{\lambda}^{\text{inc}}, j, S^{\text{new}}$ .

---

### C-4 Variables Update

#### C-4.1 UPDATE\_BY\_UTILDE\_LAMBDA

Note that all intermediate variables are not affected by  $\underline{\lambda}$ , we only need to update  $v$  and  $\mu_0$  accordingly.

---

#### Algorithm 10 UPDATE\_BY\_UTILDE\_LAMBDA

---

**Input:** Increment  $\underline{\lambda}^{\text{inc}}$ ; iterate  $v = \begin{pmatrix} x_S \\ -\mu_{S^c} \end{pmatrix}$ ,  $\mu_0$ ; intermediate variables  $\text{Par}_1, \text{Par}_3$ .

**Procedure:**

- 1:  $v \leftarrow v - \left( \xi - \frac{D_\ell}{D} \tilde{\eta} \right) \underline{\lambda}^{\text{inc}}$ ;
- 2:  $\mu_0 \leftarrow \mu_0 + \frac{D_\ell}{D} \underline{\lambda}^{\text{inc}}$ .

**Output:**  $v, \mu_0$ .

---

#### C-4.2 UPDATE\_UTILDE\_EXPAND\_SUPPORT

Since  $M$  is exactly the same as in Appendix B, we can directly apply Theorem B-5 to obtain an update of  $M$  and the updates of other parameters as a consequence.

**Theorem C-9** Let  $\gamma$  and  $\tilde{\gamma}$  be defined in Theorem B-5, i.e.

$$\gamma_{\tilde{S}} = \tilde{\gamma}_{\tilde{S}} = (M_{jS} \quad 1)^T, \quad \gamma_{\tilde{S}^c} = -A_{\tilde{S}^c j} - A_{\tilde{S}^c S} M_{jS}^T, \quad \tilde{\gamma}_{\tilde{S}^c} = 0,$$

then

- $M^+ = \mathcal{R}_j(M) + \frac{1}{A_{jj}} \gamma \tilde{\gamma}^T$ ;
- $\tilde{\eta}^+ = \mathcal{R}_j(\tilde{\eta}) + \frac{\tilde{\eta}_j}{A_{jj}} \gamma$ ;
- $D^+ = D + \frac{\tilde{\eta}_j^2}{A_{jj}}$ ;

- $\xi^+ = \mathcal{R}_j(\xi) + \frac{\xi_j}{\tilde{A}_{jj}}\gamma$ ;
- $D_\ell^+ = D_\ell + \frac{\xi_j \tilde{\eta}_j}{\tilde{A}_{jj}}$ .

**Proof** The update of  $M$ ,  $\tilde{\eta}$  and  $D$  has been proved in Theorem B-5. For any subset  $S$ , let  $I_S$  denote the matrix with  $j$ -th diagonal element equal to 1 for any  $j \in S$  and all other elements equal to 0. Then  $\xi$  and  $\xi^+$  can be rewritten as

$$\xi = -(M + I_{S^c})\ell, \quad \xi^+ = -(M^+ + I_{\tilde{S}^c})\ell.$$

Note that  $I_{S^c} - I_{\tilde{S}^c} = e_j e_j^T$  where  $e_j$  is the  $j$ -th basis vector, then we have

$$\begin{aligned} \xi^+ - \xi &= (M - M^+ + e_j e_j^T)\ell = \left( M - \mathcal{R}_j(M) - \frac{1}{\tilde{A}_{jj}}\gamma\tilde{\gamma}^T + e_j e_j^T \right)\ell = -\frac{\tilde{\gamma}^T \ell}{\tilde{A}_{jj}}\gamma + (\ell_j - M_{jS}\ell_S)e_j \\ \implies \xi^+ &= \xi - \frac{\tilde{\gamma}^T \ell}{\tilde{A}_{jj}}\gamma + (\ell_j - M_{jS}\ell_S)e_j = \mathcal{R}_j(\xi) - \frac{\tilde{\gamma}^T \ell}{\tilde{A}_{jj}}\gamma. \end{aligned}$$

Note that  $\tilde{\gamma}^T \ell = \ell_j + M_{jS}\ell_S = -\xi_j$ , we obtain that

$$\xi^+ = \mathcal{R}_j(\xi) + \frac{\xi_j}{\tilde{A}_{jj}}\gamma.$$

For  $D_\ell^+$ , we have

$$D_\ell^+ = \mathbf{1}_{\tilde{S}}^T \xi_\ell^+ = D_\ell + \frac{\xi_j}{\tilde{A}_{jj}} \cdot \mathbf{1}_{\tilde{S}}^T \gamma_{\tilde{S}} = D_\ell + \frac{\xi_j \tilde{\eta}_j}{\tilde{A}_{jj}}.$$

■

The implementation of UPDATE\_TILDE\_EXPAND\_SUPPORT is summarized in Algorithm 11.

---

**Algorithm 11** UPDATE\_UTILDE\_EXPAND\_SUPPORT

---

**Inputs:** Original support  $S$ , new index  $j$ , matrix  $A$ , vector  $\ell$ , intermediate variables  $\text{Par}_1, \text{Par}_3$ .

**Procedure:**

- 1:  $\tilde{A}_{jj} \leftarrow A_{jj} + M_{jS}A_{Sj}$ ;
- 2:  $\gamma_{\tilde{S}} \leftarrow (M_{jS}, \mathbf{1})^T, \gamma_{\tilde{S}^c} \leftarrow -A_{\tilde{S}^c j} - A_{\tilde{S}^c S}M_{jS}^T$ ;
- 3:  $\tilde{\gamma}_{\tilde{S}} \leftarrow (M_{jS}, \mathbf{1})^T, \tilde{\gamma}_{\tilde{S}^c} \leftarrow 0$ ;
- 4:  $D \leftarrow D + \frac{\tilde{\eta}_j^2}{\tilde{A}_{jj}}$ ;
- 5:  $D_\ell \leftarrow D_\ell + \frac{\xi_j \tilde{\eta}_j}{\tilde{A}_{jj}}$ ;
- 6:  $\xi \leftarrow \mathcal{R}_j(\xi) + \frac{\xi_j}{\tilde{A}_{jj}}\gamma$ ;
- 7:  $\tilde{\eta} \leftarrow \mathcal{R}_j(\tilde{\eta}) + \frac{\tilde{\eta}_j}{\tilde{A}_{jj}}\gamma$ ;
- 8:  $M_{\cdot, \tilde{S}} \leftarrow \mathcal{R}_j(M_{\cdot, \tilde{S}}) + \frac{1}{\tilde{A}_{jj}}\gamma\tilde{\gamma}_{\tilde{S}}^T$ .

**Output:**  $\text{Par}_1, \text{Par}_3$ .

---

### C-4.3 UPDATE\_UTILDE\_SHRINK\_SUPPORT

Since  $M$  is exactly the same as in Appendix B, we can directly apply Theorem B-7 to obtain an update of  $M$  and the updates of other parameters as a consequence.

**Theorem C-10** Let  $\beta$  and  $\tilde{\beta}$  be defined in Theorem B-7, i.e.

$$\beta_{\tilde{S}} = \tilde{\beta}_{\tilde{S}} = M_{\tilde{S}j}, \quad \beta_{\tilde{S}^c} = \begin{pmatrix} -1 \\ M_{S^c j} \end{pmatrix} \quad \tilde{\beta}_{\tilde{S}^c} = 0,$$

then

- $M^- = \mathcal{R}_j(M) - \frac{1}{M_{jj}} \cdot \beta \tilde{\beta}^T$ ;
- $\tilde{\eta}^- = \mathcal{R}_j(\tilde{\eta}) - \frac{\tilde{\eta}_j}{M_{jj}} \beta$ ;
- $D^- = D - \frac{\tilde{\eta}_j^2}{M_{jj}}$ ;
- $\xi^- = \mathcal{R}_j(\xi) - \frac{\xi_j}{M_{jj}} \beta$ ;
- $D_\ell^- = D_\ell - \frac{\xi_j \tilde{\eta}_j}{M_{jj}}$ .

**Proof** The update of  $M$ ,  $\tilde{\eta}$  and  $D$  has been proved in Theorem B-7 and Theorem B-8. For any subset  $S$ , let  $I_S$  denote the matrix with  $j$ -th diagonal element equal to 1 for any  $j \in S$  and all other elements equal to 0. Then  $\xi$  and  $\xi^-$  can be rewritten as

$$\xi = -(M + I_{S^c}) \ell, \quad \xi^- = -(M^- + I_{S^c}) \ell.$$

Note that  $I_{\tilde{S}^c} - I_{S^c} = e_j e_j^T$  where  $e_j$  is the  $j$ -th basis vector, then we have

$$\begin{aligned} \xi^- - \xi &= (M - M^- - e_j e_j^T) \ell = \left( \frac{1}{M_{jj}} \beta \tilde{\beta}^T + M - \mathcal{R}_j(M) - e_j e_j^T \right) \ell \\ &= \frac{\beta_{\tilde{S}}^T \ell_{\tilde{S}}}{M_{jj}} \beta + (M - \mathcal{R}_j(M) - e_j e_j^T) \ell \triangleq \frac{\beta_{\tilde{S}}^T \ell_{\tilde{S}}}{M_{jj}} \delta + \tilde{\xi}. \end{aligned}$$

By definition of  $\tilde{\xi}$

$$\tilde{\xi}_{\tilde{S}} = \ell_j M_{\tilde{S}j}, \quad \tilde{\xi}_j = M_{j\tilde{S}} \ell_{\tilde{S}} + \ell_j M_{jj} - \ell_j = -\xi_j - \ell_j, \quad \tilde{\xi}_{S^c} = \ell_j M_{S^c j},$$

and thus,

$$\tilde{\xi} = \ell_j \beta - \xi_j e_j.$$

This implies that

$$\xi^- = \xi - \xi_j e_j + \frac{\beta_{\tilde{S}}^T \ell_{\tilde{S}} + \ell_j M_{jj}}{M_{jj}} \beta = \mathcal{R}_j(\xi) - \frac{\xi_j}{M_{jj}} \beta.$$

For  $D_\ell^-$ , we have

$$D_\ell^- = \mathbf{1}_{\tilde{S}}^T \xi_{\tilde{S}}^- = D_\ell - \xi_j - \frac{\xi_j}{M_{jj}} \cdot \mathbf{1}_{\tilde{S}}^T \beta_{\tilde{S}} = D_\ell - \frac{\xi_j (\mathbf{1}_{\tilde{S}}^T \beta_{\tilde{S}} + M_{jj})}{M_{jj}} = D_\ell - \frac{\xi_j \tilde{\eta}_j}{M_{jj}}.$$

■

The implementation of UPDATE\_TILDE\_SHRINK\_SUPPORT is summarized in Algorithm 12.

---

**Algorithm 12** UPDATE\_UTILDE\_SHRINK\_SUPPORT

---

**Inputs:** Original support  $S$ , new index  $j$ , vector  $\ell$ , intermediate variables  $\text{Par}_1, \text{Par}_3$ .

**Procedure:**

- 1:  $\beta_{\tilde{S}} \leftarrow M_{j\tilde{S}}^T, \beta_{\tilde{S}^c} \leftarrow \begin{pmatrix} -1 \\ M_{\tilde{S}^c j} \end{pmatrix}, \tilde{\beta}_{\tilde{S}} \leftarrow M_{j\tilde{S}}^T, \tilde{\beta}_{\tilde{S}^c} \leftarrow 0$ ;
- 2:  $D \leftarrow D - \frac{\tilde{\eta}_j^2}{M_{jj}}$ ;
- 3:  $D_\ell \leftarrow D_\ell - \frac{\xi_j \tilde{\eta}_j}{M_{jj}}$ ;
- 4:  $\xi \leftarrow \mathcal{R}_j(\xi) - \frac{\xi_j}{M_{jj}} \beta$ ;
- 5:  $\tilde{\eta} \leftarrow \mathcal{R}_j(\tilde{\eta}) - \frac{\tilde{\eta}_j}{M_{jj}} \beta$ ;
- 6:  $M_{\cdot, \tilde{S}} \leftarrow \mathcal{R}_j(M_{\cdot, \tilde{S}}) - \frac{1}{M_{jj}} \beta \tilde{\beta}_{\tilde{S}}^T, M_{\cdot, j} \leftarrow 0$ .

**Output:**  $\text{Par}_1, \text{Par}_3$ .

---



---

**Algorithm 13** DIRECT\_UTILDE\_UPDATE

---

**Inputs:** Support  $S$ , vector-update-vector  $\ell$ , intermediate variables  $M$ .

**Procedure:**

- 1:  $\xi_S \leftarrow -M_{SS}\ell_S$ ,  $\xi_{S^c} \leftarrow -\ell_{S^c} - M_{S^cS}\ell_S$ ;
- 2:  $D_\ell \leftarrow \mathbf{1}_S^T \xi_S$ .

**Output:**  $\xi, D_\ell$ .

---

#### C-4.4 DIRECT\_UTILDE\_UPDATE

At the beginning of each time  $t$ , we need to recompute  $\xi$  and  $D_\ell$ . The implementation is summarized in Algorithm 13.

#### C-5 Complexity Analysis

Similar to Appendix B, we can analyze the computation complexity. The analysis here is much simpler than the last case since the implementation is quite straightforward. Table 2 summarizes the results.

Table 2: Computation complexity of each sub-routine in Algorithm 8.

|                              | $(Wz)$ -type | $(z\tilde{z}^T)$ -type | $(z^T z)$ -type | $(az)$ -type |
|------------------------------|--------------|------------------------|-----------------|--------------|
| FIND_UTILDE_LAMBDA           | 0            | 0                      | $2n$            | 0            |
| UPDATE_BY_UTILDE_LAMBDA      | 0            | 0                      | 0               | $n$          |
| UPDATE_UTILDE_EXPAND_SUPPORT | $(n-s-1)s$   | $n(s+1)$               | $s$             | $2n$         |
| UPDATE_UTILDE_SHRINK_SUPPORT | 0            | $n(s-1)$               | 0               | $2n$         |
| DIRECT_UTILDE_UPDATE         | $ns$         | 0                      | $s$             | 0            |

Let  $k_r^+$  and  $k_r^-$  be the number of turning points that  $S$  is expanded and shrunk respectively and  $k_r = k_r^+ + k_r^-$  be the total number of tuning points, then the complexity is

$$C_{2t} \leq ns + n + 3nk_r + n(2s+3)k_r^+ + n(s+1)k_r^- + O(k_r) = ns(2k_r+1) + n(6k_r+1) + O(k_r).$$

### D Implementation of HONES Algorithm With Time-Varying $A, r$

#### D-1 Intermediate Variables

Based on the results in Appendix B and Appendix C, we can concatenate Algorithm 1 and Algorithm 8. Thus we define  $\text{Par}_1, \text{Par}_2, \text{Par}_3$  as  $\text{Par}_1 = \{M, \tilde{\eta}, D\}, \text{Par}_2 = \{\eta, D_g, D_{gg}, D_{gr}\}, \text{Par}_3 = \{\xi, D_\ell\}$  where all parameters are defined in previous appendices.

#### D-2 Implementation

Note that only two sub-routines involves the matrix  $A$ , namely UPDATE\_EXPAND\_SUPPORT and UPDATE\_UTILDE\_EXPAND\_SUPPORT, and moreover they only involve the  $j$ -th column of  $A$ . Thus, we can use the sparse update of  $A$  as in Algorithm 7 for acceleration. Algorithm 14 below describes the implementation.

#### D-3 Complexity Analysis

The complexity of Algorithm 14 is just the sum of that of Algorithm 1 and Algorithm 8, i.e.

$$C_t = C_{1t} + C_{2t} = ns_* + ns(3k_A + 2k_r + 2) + n(12k_A + 6k_r + 3) + O(k_A + k_r).$$

---

**Algorithm 14** HONES Algorithm for time-varying  $A, r$  with sparse update of  $A$ 

---

**Inputs:** Initial parameters  $A^{(0)}$ , vectors  $\{r^{(t)} : t = 1, 2, \dots\}$ ,  
matrix-update-vectors  $\{g^{(t)}, t = 1, 2, \dots\}$ .

**Initialization:**

$x \leftarrow$  as the optimum corresponding to  $A^{(0)}, r^{(0)}$ .  
 $S \leftarrow \text{supp}(x), S_* \leftarrow S$ ;  
Calculate  $(x, \mu, \mu_0)$  via (8)-(10)  
 $v \leftarrow (x_S, -\mu_{S^c})$ ;  
Calculate intermediate variables  $(\text{Par}_1, \text{Par}_2)$  via (B-1)-(B-3) based on  $r^{(0)}, g^{(1)}$ ;

**Procedure:**

```
1: for  $t = 1, 2, \dots$  do
2:    $\lambda \leftarrow 0$ ;
3:   while  $\lambda < 1$  do
4:      $(\lambda^{\text{inc}}, j, S^{\text{new}}) \leftarrow \text{FIND\_LAMBDA}(S, v; \text{Par}_1, \text{Par}_2)$ ;
5:      $\lambda^{\text{inc}} \leftarrow \min\{\lambda^{\text{inc}}, 1 - \lambda\}$ ;
6:      $\lambda \leftarrow \lambda + \lambda^{\text{inc}}$ ;
7:      $(v, \mu_0; \text{Par}_1, \text{Par}_2) \leftarrow \text{UPDATE\_BY\_LAMBDA}(\lambda^{\text{inc}}; v, \mu_0, \text{Par}_1, \text{Par}_2)$ ;
8:     if  $S^{\text{new}} = S \cup \{j\}$  then
9:        $(\text{Par}_1, \text{Par}_2) \leftarrow \text{UPDATE\_EXPAND\_SUPPORT}(\lambda, S, j; A, r^{(t-1)}, g^{(t)}, \text{Par}_1, \text{Par}_2)$ ;
10:      if  $j \notin S_*$  then
11:         $G \leftarrow (g^{(1)}, \dots, g^{(t-1)})$ ;
12:         $A_{\cdot, j} \leftarrow A_{\cdot, j} + GG_{j, \cdot}^T$ ;
13:         $S_* = S_* \cup \{j\}$ ;
14:      end if
15:    else if  $S^{\text{new}} = S \setminus \{j\}$  then
16:       $(\text{Par}_1, \text{Par}_2) \leftarrow \text{UPDATE\_SHRINK\_SUPPORT}(S, j; r^{(t-1)}, g^{(t)}, \text{Par}_1, \text{Par}_2)$ ;
17:    end if
18:     $S \leftarrow S^{\text{new}}$ ;
19:  end while
20:   $A_{\cdot, S_*} \leftarrow A_{\cdot, S_*} + g^{(t)}(g_{S_*}^{(t)})^T$ ;
21:   $\ell^{(t)} \leftarrow r^{(t)} - r^{(t-1)}$ ;
22:   $\text{Par}_3 \leftarrow \text{DIRECT\_UTILDE\_UPDATE}(S, \text{Par}_1, \ell^{(t)})$ ;
23:   $\underline{\lambda} \leftarrow 0$ ;
24:  while  $\underline{\lambda} < 1$  do
25:     $(\underline{\lambda}^{\text{inc}}, j, S^{\text{new}}) \leftarrow \text{FIND\_UTILDE\_LAMBDA}(v; \text{Par}_1, \text{Par}_3)$ ;
26:     $\underline{\lambda}^{\text{inc}} \leftarrow \min\{\underline{\lambda}^{\text{inc}}, 1 - \underline{\lambda}\}$ ;
27:     $(v, \mu_0) \leftarrow \text{UPDATE\_BY\_UTILDE\_LAMBDA}(\underline{\lambda}^{\text{inc}}; v, \mu_0, \text{Par}_1, \text{Par}_3)$ ;
28:    if  $S^{\text{new}} = S \cup \{j\}$  then
29:       $(\text{Par}_1, \text{Par}_3) \leftarrow \text{UPDATE\_UTILDE\_EXPAND\_SUPPORT}(S, j, A, \ell^{(t)}; \text{Par}_1, \text{Par}_3)$ ;
30:      if  $j \notin S_*$  then
31:         $G \leftarrow (g^{(1)}, \ell^{(t)} \text{ dots}, g^{(t-1)})$ ;
32:         $A_{\cdot, j} \leftarrow A_{\cdot, j} + GG_{j, \cdot}^T$ ;
33:         $S_* = S_* \cup \{j\}$ ;
34:      end if
35:    else if  $S^{\text{new}} = S \setminus \{j\}$  then
36:       $(\text{Par}_1, \text{Par}_3) \leftarrow \text{UPDATE\_UTILDE\_SHRINK\_SUPPORT}(S, j, \ell^{(t)}; \text{Par}_1, \text{Par}_3)$ ;
37:    end if
38:     $S \leftarrow S^{\text{new}}$ ;
39:     $\underline{\lambda} \leftarrow \underline{\lambda} + \underline{\lambda}^{\text{inc}}$ .
40:  end while
41:   $\text{Par}_2 \leftarrow \text{DIRECT\_UPDATE}(S, r^{(t)}, g^{(t+1)}; \text{Par}_1, \text{Par}_2)$ ;
42:   $x_S^{(t)} \leftarrow x_S, x_{S^c}^{(t)} \leftarrow 0$ .
43: end for
```

**Output:**  $x^{(1)}, x^{(2)}, \dots$

---

## E Dealing With General Linear Constraints

Now we consider the problem with general linear constraints:

$$\min \frac{1}{2}x^T A^{(t)}x - (r^{(t)})^T x, \quad s.t. \quad Bx = b, x \geq 0$$

where  $B \in \mathbb{R}^{m \times n}$  and  $A^{(t)}$  is a stream with

$$A^{(t+1)} = A^{(t)} + g^{(t)}(g^{(t)})^T.$$

Similar to (8)-(10), the KKT condition for a single problem (with the superscript  $(t)$  erased temporarily) can be written as

$$Ax - B^T \mu_0 - \mu - r = 0; \quad (\text{E-13})$$

$$Bx = b; \quad (\text{E-14})$$

$$\mu_i x_i = 0, \mu_i \geq 0, x_i \geq 0, \forall i = 1, \dots, n, \quad (\text{E-15})$$

where  $\mu_0 \in \mathbb{R}^m, \mu \in \mathbb{R}^n$ . Partitioning the matrix  $A$  by the support of  $x$ , we have

$$\begin{aligned} & \begin{pmatrix} A_{SS} & A_{SS^c} \\ A_{S^cS} & A_{S^cS^c} \end{pmatrix} \begin{pmatrix} x_S \\ 0 \end{pmatrix} \\ &= \begin{pmatrix} B_S^T \\ B_{S^c}^T \end{pmatrix} \mu_0 + \begin{pmatrix} 0 \\ \mu_{S^c} \end{pmatrix} + \begin{pmatrix} r_S \\ r_{S^c} \end{pmatrix}. \end{aligned}$$

As a consequence, we can solve  $x_S$  and  $\mu_{S^c}$  by

$$x_S = A_{SS}^{-1} B_S^T \mu_0 + A_{SS}^{-1} r_S; \quad (\text{E-16})$$

$$\mu_{S^c} = A_{S^cS} x_S - B_{S^c}^T \mu_0 - r_{S^c} = -(B_{S^c}^T - A_{S^cS} A_{SS}^{-1} B_S^T) \mu_0 - (r_{S^c} - A_{S^cS} A_{SS}^{-1} r_S). \quad (\text{E-17})$$

Using the constraint E-14, we can solve  $\mu_0$  as

$$\mu_0 = (B_S A_{SS}^{-1} B_S^T)^{-1} (b - B_S A_{SS}^{-1} r_S). \quad (\text{E-18})$$

Noticing that (E-16)-(E-18) share similar forms to (8)-(10), we can easily derive a counterpart of Theorem E-11.

### Theorem E-11

1. Fixing  $\lambda$ , there exists vectors  $u_1, u_2 \in \mathbb{R}^{n+m}$  and scalars  $D_1, D_2 \in \mathbb{R}$ , which only depend on  $S$ , such that

$$\begin{pmatrix} x_S(\lambda) \\ -\mu_{S^c}(\lambda) \\ \mu_0(\lambda) \end{pmatrix} = \frac{u_1 - u_2 \lambda}{D_1 - D_2 \lambda}. \quad (\text{E-19})$$

2. Fixing  $\lambda$ , there exists vectors  $\underline{u}_1, \underline{u}_2 \in \mathbb{R}^{n+m}$ , which only depend on  $S$ , such that

$$\begin{pmatrix} x_S(\lambda) \\ -\mu_{S^c}(\lambda) \\ \mu_0(\lambda) \end{pmatrix} = \underline{u}_1 - \underline{u}_2 \lambda. \quad (\text{E-20})$$

### Proof

1. By Lemma B-1, we have

$$A_{SS}(\lambda)^{-1} = A_{SS}^{-1} - \alpha(\lambda) g_S g_S^T$$

and

$$A_{S^cS}(\lambda) A_{SS}(\lambda)^{-1} = A_{S^cS} A_{SS}^{-1} - \alpha(\lambda) g_{S^c} g_S^T.$$

As a result,

$$\mu_0(\lambda) = (B_S A_{SS}^{-1} B_S^T - \alpha(\lambda) \cdot B_S g_S (B_S g_S)^T)^{-1} (b - B_S A_{SS}^{-1} r_S + (g_S^T r_S) \alpha(\lambda) \cdot B_S g_S)$$

$$\begin{aligned}
&= \left( (B_S A_{SS}^{-1} B_S^T)^{-1} + \frac{\alpha(\lambda) (B_S A_{SS}^{-1} B_S^T)^{-1} B_S g_S g_S^T B_S^T (B_S A_{SS}^{-1} B_S^T)^{-1}}{1 - \alpha(\lambda) g_S^T B_S^T (B_S A_{SS}^{-1} B_S^T)^{-1} B_S g_S} \right) \cdot \\
&\quad (b - B_S A_{SS}^{-1} r_S + (g_S^T r_S) \alpha(\lambda) \cdot B_S g_S) \\
&= \mu_0 + \frac{\alpha(\lambda) (B_S A_{SS}^{-1} B_S^T)^{-1} B_S g_S g_S^T B_S^T \mu_0}{1 - \alpha(\lambda) g_S^T B_S^T (B_S A_{SS}^{-1} B_S^T)^{-1} B_S g_S} \\
&\quad + \frac{\alpha(\lambda) (B_S A_{SS}^{-1} B_S^T)^{-1} B_S g_S}{1 - \alpha(\lambda) g_S^T B_S^T (B_S A_{SS}^{-1} B_S^T)^{-1} B_S g_S} \cdot g_S^T r_S \\
&= \mu_0 + \frac{\alpha(\lambda) (B_S A_{SS}^{-1} B_S^T)^{-1} B_S g_S}{1 - \alpha(\lambda) g_S^T B_S^T (B_S A_{SS}^{-1} B_S^T)^{-1} B_S g_S} \cdot g_S^T (B_S^T \mu_0 + r_S).
\end{aligned}$$

Similarly,

$$\begin{aligned}
x_S(\lambda) &= (A_{SS}^{-1} - \alpha(\lambda) g_S g_S^T) B_S^T \left( \mu_0 + \frac{\alpha(\lambda) (B_S A_{SS}^{-1} B_S^T)^{-1} B_S g_S}{1 - \alpha(\lambda) g_S^T B_S^T (B_S A_{SS}^{-1} B_S^T)^{-1} B_S g_S} \cdot g_S^T (B_S^T \mu_0 + r_S) \right) \\
&\quad + (A_{SS}^{-1} - \alpha(\lambda) g_S g_S^T) r_S \\
&= x_S - \alpha(\lambda) g_S \cdot g_S^T (B_S^T \mu_0 + r_S) + \\
&\quad + (A_{SS}^{-1} - \alpha(\lambda) g_S g_S^T) \cdot \frac{\alpha(\lambda) B_S^T (B_S A_{SS}^{-1} B_S^T)^{-1} B_S g_S}{1 - \alpha(\lambda) g_S^T B_S^T (B_S A_{SS}^{-1} B_S^T)^{-1} B_S g_S} \cdot g_S^T (B_S^T \mu_0 + r_S) \\
&= x_S - \frac{\alpha(\lambda)}{1 - \alpha(\lambda) g_S^T B_S^T (B_S A_{SS}^{-1} B_S^T)^{-1} B_S g_S} \cdot g_S^T (B_S^T \mu_0 + r_S) \cdot (I - A_{SS}^{-1} B_S^T (B_S A_{SS}^{-1} B_S^T)^{-1} B_S) g_S,
\end{aligned}$$

and

$$\mu_{S^c}(\lambda) = - (B_{S^c}^T - A_{S^c S} A_{SS}^{-1} B_S^T + \alpha(\lambda) g_{S^c} g_S^T B_S^T)$$

■
